# Supplementary material for: Epidemiologic Patterns and Disparities in Cardiovascular Deaths Associated With Respiratory Failure Across Two Decades in the U.S
Source: Research Square preprint supplement (doi:10.21203/rs.3.rs-8241552/v1), 2025-12-26
Supplement: Supplementary file 1 [file c55a12c6fd2a372415ba2855.xlsx]

## Sheet: Sheet1
	Measure	Deaths_1999	Deaths_2020	percent.change	AAMR_1999	AAMR_2020	AAPC (95% CI）
0	Both	34302	75670	120.6	19.48 (19.27 to 19.69)	28.22 (28.02 to 28.42)	1.70 (1.13 to 2.27)*
1	Female	19082	37792	98.05	17.31 (17.07 to 17.56)	24.45 (24.20 to 24.70)	1.56 (0.83 to 2.29)*
2	Male	15220	37878	148.87	22.88 (22.51 to 23.26)	32.94 (32.61 to 33.28)	1.71 (1.37 to 2.05)*
3	Midwest	6883	15612	126.82	16.21 (15.83 to 16.60)	27.22 (26.78 to 27.65)	2.40 (1.92 to 2.89)*
4	Northeast	7051	12902	82.98	18.71 (18.28 to 19.15)	25.62 (25.17 to 26.07)	1.50 (1.23 to 1.77)*
5	South	12575	29894	137.73	20.48 (20.12 to 20.84)	29.66 (29.32 to 30.00)	1.64 (1.25 to 2.03)*
6	West	7793	17262	121.51	22.68 (22.17 to 23.18)	28.73 (28.30 to 29.17)	1.29 (0.61 to 1.96)*
7	Hispanic	1643	6400	289.53	21.56 (20.49 to 22.64)	25.45 (24.81 to 26.09)	0.96 (0.47 to 1.44)*
8	NH Black	3769	9794	159.86	26.17 (25.33 to 27.01)	37.17 (36.41 to 37.92)	1.35 (1.01 to 1.69)*
9	NH Other	795	2900	264.78	18.97 (17.59 to 20.34)	18.92 (18.22 to 19.62)	0.40 (-0.03 to 0.83)
10	NH White	28004	56451	101.58	18.67 (18.45 to 18.88)	27.79 (27.55 to 28.02)	1.85 (1.23 to 2.48)*
11	Metropolitan	28384	61923	118.16	19.98 (19.75 to 20.21)	27.61 (27.39 to 27.83)	1.50 (0.88 to 2.11)*
12	Nonmetropolitan	5918	13747	132.29	17.52 (17.07 to 17.96)	31.56 (31.02 to 32.10)	2.67 (2.27 to 3.08)*
13	Alabama	626	1369	118.69	21.84 (20.12 to 23.55)	33.63 (31.81 to 35.45)	1.72 (1.00 to 2.44)*
14	Alaska		70		nan (nan to nan)	16.77 (12.91 to 21.41)
15	Arizona	523	1528	192.16	16.69 (15.25 to 18.13)	23.96 (22.74 to 25.18)	1.03 (-0.84 to 2.93)
16	Arkansas	357	1309	266.67	19.06 (17.08 to 21.04)	51.73 (48.89 to 54.57)	4.67 (3.19 to 6.18)*
17	California	5584	9491	69.97	31.10 (30.29 to 31.92)	31.97 (31.32 to 32.62)	0.31 (-0.59 to 1.22)
18	Colorado	331	1066	222.05	15.84 (14.13 to 17.55)	26.52 (24.91 to 28.14)	2.55 (0.98 to 4.14)*
19	Connecticut	603	947	57.05	24.17 (22.24 to 26.10)	28.47 (26.63 to 30.31)	0.57 (0.19 to 0.96)*
20	Delaware	113	136	20.35	23.04 (18.77 to 27.31)	15.04 (12.48 to 17.61)	-0.97 (-1.96 to 0.03)
21	District of Columbia	103	100	-2.91	28.60 (23.08 to 34.13)	21.88 (17.53 to 26.22)	-1.33 (-2.50 to -0.15)*
22	Florida	2899	6279	116.59	21.12 (20.35 to 21.89)	27.92 (27.21 to 28.62)	1.30 (0.87 to 1.74)*
23	Georgia	1087	2549	134.5	27.69 (26.04 to 29.35)	34.37 (33.01 to 35.72)	0.56 (-0.20 to 1.33)
24	Hawaii	169	180	6.51	21.88 (18.57 to 25.18)	13.25 (11.26 to 15.24)	-1.64 (-2.16 to -1.12)*
25	Idaho	60	473	688.33	8.11 (6.19 to 10.44)	35.35 (32.13 to 38.57)	7.44 (2.17 to 12.98)*
26	Illinois	1144	2226	94.58	14.82 (13.96 to 15.67)	21.68 (20.77 to 22.60)	2.00 (1.49 to 2.51)*
27	Indiana	574	2125	270.21	15.03 (13.80 to 16.26)	39.92 (38.20 to 41.64)	4.75 (2.83 to 6.71)*
28	Iowa	308	799	159.42	13.05 (11.58 to 14.51)	28.50 (26.48 to 30.52)	4.14 (3.22 to 5.05)*
29	Kansas	323	707	118.89	17.04 (15.17 to 18.91)	29.37 (27.17 to 31.58)	2.65 (1.09 to 4.24)*
30	Kentucky	464	1423	206.68	18.46 (16.78 to 20.14)	39.10 (37.04 to 41.16)	3.76 (2.90 to 4.63)*
31	Louisiana	447	967	116.33	17.51 (15.88 to 19.14)	27.08 (25.35 to 28.82)	2.32 (0.71 to 3.95)*
32	Maine	180	176	-2.22	19.44 (16.60 to 22.28)	12.86 (10.93 to 14.80)	-1.58 (-3.96 to 0.85)
33	Maryland	466	894	91.85	15.58 (14.16 to 17.00)	18.52 (17.29 to 19.75)	1.25 (0.10 to 2.41)*
34	Massachusetts	798	1555	94.86	17.66 (16.43 to 18.88)	25.83 (24.53 to 27.13)	1.71 (0.32 to 3.12)*
35	Michigan	1020	2250	120.59	16.67 (15.64 to 17.69)	26.26 (25.16 to 27.36)	2.29 (1.43 to 3.16)*
36	Minnesota	187	983	425.67	5.89 (5.05 to 6.74)	21.08 (19.75 to 22.42)	6.33 (5.15 to 7.52)*
37	Mississippi	542	1298	139.48	31.30 (28.67 to 33.94)	56.38 (53.26 to 59.50)	1.96 (0.15 to 3.81)*
38	Missouri	681	1435	110.72	17.61 (16.29 to 18.93)	27.34 (25.91 to 28.78)	1.52 (0.17 to 2.88)*
39	Montana	56	352	528.57	9.04 (6.83 to 11.74)	36.07 (32.24 to 39.89)	6.86 (4.58 to 9.19)*
40	Nebraska	207	514	148.31	16.69 (14.40 to 18.98)	32.64 (29.77 to 35.51)	3.33 (1.74 to 4.94)*
41	Nevada	325	706	117.23	33.68 (29.91 to 37.46)	30.28 (28.01 to 32.55)	-0.17 (-1.93 to 1.61)
42	New Hampshire	101	298	195.05	13.57 (10.92 to 16.21)	24.07 (21.30 to 26.84)	2.76 (1.35 to 4.18)*
43	New Jersey	1018	2313	127.21	18.08 (16.97 to 19.19)	30.16 (28.91 to 31.40)	3.00 (2.62 to 3.39)*
44	New Mexico	104	326	213.46	10.15 (8.19 to 12.11)	18.61 (16.56 to 20.67)	4.01 (3.31 to 4.73)*
45	New York	2088	4021	92.58	16.76 (16.04 to 17.48)	23.62 (22.88 to 24.36)	1.34 (0.80 to 1.89)*
46	North Carolina	763	2150	181.78	16.14 (14.99 to 17.29)	25.34 (24.26 to 26.43)	2.03 (1.48 to 2.58)*
47	North Dakota	70	166	137.14	13.88 (10.80 to 17.57)	25.99 (21.94 to 30.04)	4.98 (3.81 to 6.15)*
48	Ohio	1979	3192	61.29	26.21 (25.05 to 27.36)	31.76 (30.64 to 32.88)	0.50 (0.03 to 0.98)*
49	Oklahoma	577	693	20.1	24.99 (22.95 to 27.03)	22.36 (20.68 to 24.04)	-0.35 (-1.51 to 0.82)
50	Oregon	169	808	378.11	7.40 (6.28 to 8.52)	22.58 (21.00 to 24.16)	5.41 (2.41 to 8.49)*
51	Pennsylvania	2072	3296	59.07	21.31 (20.39 to 22.23)	27.19 (26.25 to 28.13)	1.18 (0.80 to 1.56)*
52	Rhode Island	136	178	30.88	16.75 (13.93 to 19.58)	18.06 (15.35 to 20.76)	0.44 (-2.18 to 3.13)
53	South Carolina	397	1642	313.6	17.00 (15.32 to 18.68)	37.66 (35.79 to 39.52)	3.25 (1.96 to 4.57)*
54	South Dakota	45	188	317.78	7.68 (5.58 to 10.31)	24.59 (20.99 to 28.18)	5.37 (3.45 to 7.32)*
55	Tennessee	784	1747	122.83	22.42 (20.85 to 23.99)	31.60 (30.09 to 33.10)	1.53 (0.73 to 2.33)*
56	Texas	1854	5531	198.33	17.98 (17.16 to 18.80)	29.58 (28.79 to 30.37)	2.54 (1.57 to 3.53)*
57	Utah	94	519	452.13	9.98 (8.05 to 12.22)	29.50 (26.94 to 32.06)	4.41 (1.01 to 7.92)*
58	Vermont	55	118	114.55	13.96 (10.52 to 18.17)	20.38 (16.62 to 24.14)	0.89 (-1.85 to 3.71)
59	Virginia	695	1308	88.2	17.76 (16.43 to 19.08)	19.58 (18.51 to 20.65)	0.59 (0.28 to 0.89)*
60	Washington	343	1635	376.68	10.00 (8.94 to 11.06)	28.18 (26.80 to 29.56)	5.43 (4.41 to 6.46)*
61	West Virginia	401	499	24.44	29.31 (26.44 to 32.18)	28.99 (26.40 to 31.59)	0.21 (-0.25 to 0.67)
62	Wisconsin	345	1027	197.68	9.44 (8.44 to 10.44)	20.47 (19.20 to 21.75)	4.14 (3.06 to 5.23)*
63	Wyoming	26	108	315.38	9.22 (6.02 to 13.51)	22.84 (18.47 to 27.21)	3.83 (2.56 to 5.11)*
